# Supplementary material
Source: publisher figshare collection journal article supplement (https://acs.figshare.com/ndownloader/files/17827478)
Supplement: Supplementary file 1 [file 17827478]

## Sheet: TCS-Supporting Informatioin
Triclosan affects Ca2+ regulatory module and musculature development in skeletal myocyte during early life stage of zebrafish (Danio rerio)
Zhiyuan Ma,† Hongling Liu,†, * Hongxia Yu†
† State Key Laboratory of Pollution Control and Resource Reuse, School of the Environment, Nanjing University, Nanjing 210023, China
* Corresponding author:
Hongling Liu, State Key Laboratory of Pollution Control and Resource Reuse, School of the Environment, Nanjing University, Nanjing 210023, China
Tel.: +86-25-89680356
Email: hlliu@nju.edu.cn (Hongling Liu)

## Sheet: Contents
Contents：
Table S1. Optimized instrumental parameters, multiple reaction monitoring (MRM; mass-to-charge (m/z)) transitions and limit of quantification (LOQ)) for Triclosan analyzed by liquid chromatography–electrospray ionization (-)-tandem mass spectrometry.
Table S2. Concentration of Triclosan (TCS) in water or zebrafish samples during 96 h dynamics research. Three replicates were extracted and analyzed for each treatment type.
Table S3. Primer Sequences of receptor-associated genes for RT-PCR.
Table S4. Fold-change of gene expressions in NR pathways, *p<0.05, **p<0.01 indicates significant difference between exposure groups and the control.

## Sheet: Table S1
Table S1. Optimized instrumental parameters, multiple reaction monitoring (MRM; mass-to-charge (m/z)) transitions and limit of quantification (LOQ)) for Triclosan analyzed by liquid chromatography–electrospray ionization (-)-tandem mass spectrometry.
Compound	Precursor ion (m/z)	Quantification			Confirmation			Linearity, R2 (0.1-100 μM)	LOQ		Recovery (%)
		Q3	Declustering potential (v)	Collision energy (eV)	Q3	Declustering potential (v)	Collision energy (eV)		(μM)		Water	fish
Triclosan	287[M-H]-	35.1	-41	-35	92.9	-64	-24	0.9992	0.005		103.62±4.03	93.11±0.04

## Sheet: Table S2
Table S2. Concentration of Triclosan (TCS) in water or zebrafish samples during 96 h dynamics research. Three replicates were extracted and analyzed for each treatment type.
Standard Curve
Standard Name	Component Name	Retention Time	Area	Calculated Concentration (μMol/L)
0.005	287.0 / 35.1	5.53077	6199.19	0.00452886
0.01	287.0 / 35.1	5.53377	10909.5	0.0107287
0.05	287.0 / 35.1	5.53377	41433.4	0.0509059
0.1	287.0 / 35.1	5.53133	81727.2	0.103942
0.15	287.0 / 35.1	5.53399	117420	0.150923
0.2	287.0 / 35.1	5.53614	158639	0.205178
0.25	287.0 / 35.1	5.53416	188662	0.244696
0.3	287.0 / 35.1	5.53358	230071	0.2992
Water samples								Zebrafish samples
Sample Name	Component Name	Retention Time	Area	Calculated Concentration (μMol/L)	Mean (μMol/L)	Standard deviation		Sample Name	Component Name	Retention Time	Area	Calculated Concentration (μMol/kg)	Mean (μMol/kg)	Standard deviation
0h-Control-1	287.0 / 35.1	5.53	2002.48	N.D.	N.D.	-		Control-1	287.0 / 35.1	5.56	12423.7	N.D.	N.D.	-
0h-Control-2	287.0 / 35.1	5.53	2159.69	N.D.				Control-2	287.0 / 35.1	5.55	10229.9	N.D.
0h-Control-3	287.0 / 35.1	5.53	2182.94	N.D.				Control-3	287.0 / 35.1	5.54	7624.26	N.D.
0h-0.03-1	287.0 / 35.1	5.54	66399.2	0.0419	0.0418	0.0004		12H-Control-1	287.0 / 35.1	5.56	4637.57	N.D.	N.D.	-
0h-0.03-2	287.0 / 35.1	5.54	65508.9	0.0413				12H-Control-2	287.0 / 35.1	5.55	2581.52	N.D.
0h-0.03-3	287.0 / 35.1	5.54	67132.9	0.0424				12H-Control-3	287.0 / 35.1	5.56	1169.36	N.D.
0h-0.13-1	287.0 / 35.1	5.54	202837	0.1317	0.1316	0.0034		12H-0.03-1	287.0 / 35.1	5.55	27601.3	0.00801801	0.00680881	0.00106129
0h-0.13-2	287.0 / 35.1	5.54	196372	0.1274				12H-0.03-2	287.0 / 35.1	5.55	25322	0.00697421
0h-0.13-3	287.0 / 35.1	5.54	208962	0.1357				12H-0.03-3	287.0 / 35.1	5.55	21959.2	0.00543422
0h-0.26-1	287.0 / 35.1	5.54	364551	0.2381	0.2459	0.0059		12H-0.13-1	287.0 / 35.1	5.55	71007	0.0278953	0.0266975	0.0022649
0h-0.26-2	287.0 / 35.1	5.54	378421	0.2472				12H-0.13-2	287.0 / 35.1	5.55	61465.7	0.023526
0h-0.26-3	287.0 / 35.1	5.54	386338	0.2524				12H-0.13-3	287.0 / 35.1	5.55	72701.4	0.0286713
0h-0.52-1	287.0 / 35.1	5.54	350836	0.5269	0.5423	0.0163		12H-0.26-1	287.0 / 35.1	5.56	171999	0.0741438	0.0874839	0.00965628
0h-0.52-2	287.0 / 35.1	5.54	356392	0.5353				12H-0.26-2	287.0 / 35.1	5.55	221217	0.0966832
0h-0.52-3	287.0 / 35.1	5.54	375885	0.5648				12H-0.26-3	287.0 / 35.1	5.55	210171	0.0916246
0h-1.04-1	287.0 / 35.1	5.53	336156	1.0093	1.0445	0.0331		12H-0.52-1	287.0 / 35.1	5.55	233898	0.10249	0.109104	0.0274449
0h-1.04-2	287.0 / 35.1	5.53	344770	1.0354				12H-0.52-2	287.0 / 35.1	5.56	183235	0.0792894
0h-1.04-3	287.0 / 35.1	5.54	362389	1.0887				12H-0.52-3	287.0 / 35.1	5.56	327888	0.145532
0h-1.73-1	287.0 / 35.1	5.54	371344	1.7465	1.7584	0.1153		12H-1.04-1	287.0 / 35.1	5.56	637596	0.287361	0.270658	0.0129065
0h-1.73-2	287.0 / 35.1	5.54	404822	1.9052				12H-1.04-2	287.0 / 35.1	5.55	596803	0.26868
oh-1.73-h	287.0 / 35.1	5.54	345375	1.6235				12H-1.04-3	287.0 / 35.1	5.55	568967	0.255933
12h-Control-1	287.0 / 35.1	5.53	3182.14	N.D.	N.D.	-		12H-1.73-1	287.0 / 35.1	5.55	1.00537e+06	0.455779	0.388873	0.058661
12h-Control-2	287.0 / 35.1	5.53	2923.78	N.D.				12H-1.73-2	287.0 / 35.1	5.55	878971	0.397897
12h-Control-3	287.0 / 35.1	5.53	2778.64	N.D.				12H-1.73-3	287.0 / 35.1	5.55	693457	0.312942
12h-0.03-1	287.0 / 35.1	5.53	50597.5	0.0315	0.033	0.0012		24H-Control-1	287.0 / 35.1	5.55	9024.52	N.D.	N.D.	-
12h-0.03-2	287.0 / 35.1	5.54	55000.4	0.0344				24H-Control-2	287.0 / 35.1	5.55	7083.19	N.D.
12h-0.03-3	287.0 / 35.1	5.54	52955.7	0.033				24H-Control-3	287.0 / 35.1	5.55	6532.77	N.D.
12h-0.13-1	287.0 / 35.1	5.54	167680	0.1085	0.1092	0.0005		24H-0.03-1	287.0 / 35.1	5.55	49252.7	0.0179331	0.0180809	0.00235416
12h-0.13-2	287.0 / 35.1	5.54	169353	0.1096				24H-0.03-2	287.0 / 35.1	5.55	56026.8	0.0210353
12h-0.13-3	287.0 / 35.1	5.54	169073	0.1095				24H-0.03-3	287.0 / 35.1	5.55	43447.1	0.0152745
12h-0.26-1	287.0 / 35.1	5.53	322972	0.2107	0.2059	0.005		24H-0.13-1	287.0 / 35.1	5.54	137740	0.0584551	0.0597567	0.00130162
12h-0.26-2	287.0 / 35.1	5.53	305196	0.199				24H-0.13-2	287.0 / 35.1	5.54	143424	0.0610583
12h-0.26-3	287.0 / 35.1	5.53	318478	0.2078				24H-0.26-1	287.0 / 35.1	5.54	276488	0.121994	0.103249	0.0133799
12h-0.52-1	287.0 / 35.1	5.53	316064	0.4742	0.4642	0.0096		24H-0.26-2	287.0 / 35.1	5.54	219969	0.0961116
12h-0.52-2	287.0 / 35.1	5.53	311283	0.467				24H-0.26-3	287.0 / 35.1	5.54	210206	0.0916405
12h-0.52-3	287.0 / 35.1	5.53	300878	0.4513				24H-0.52-1	287.0 / 35.1	5.54	435748	0.194926	0.207155	0.0109695
12h-1.04-1	287.0 / 35.1	5.53	309791	0.9295	0.9094	0.0159		24H-0.52-2	287.0 / 35.1	5.54	457753	0.205003
12h-1.04-2	287.0 / 35.1	5.53	296968	0.8907				24H-0.52-3	287.0 / 35.1	5.55	493855	0.221536
12h-1.04-3	287.0 / 35.1	5.53	302699	0.908				24H-1.04-1	287.0 / 35.1	5.54	1.19072e+06	0.540661	0.580816	0.0288116
12h-1.73-1	287.0 / 35.1	5.53	357354	1.6802	1.656	0.0172		24H-1.04-2	287.0 / 35.1	5.55	1.33532e+06	0.606879
12h-1.73-2	287.0 / 35.1	5.53	349441	1.6428				24H-1.04-3	287.0 / 35.1	5.55	1.30918e+06	0.594909
12h-1.73-3	287.0 / 35.1	5.53	349905	1.645				24H-1.73-1	287.0 / 35.1	5.55	1.87472e+06	0.853894	0.849236	0.0326729
24h-Control-1	287.0 / 35.1	5.53	3463.35	N.D.	N.D.	-		24H-1.73-2	287.0 / 35.1	5.55	1.9464e+06	0.886719
24h-Control-2	287.0 / 35.1	5.54	2930.82	N.D.				24H-1.73-3	287.0 / 35.1	5.55	1.77253e+06	0.807094
24h-Control-3	287.0 / 35.1	5.53	2949.75	N.D.				48H-Control-1	287.0 / 35.1	5.55	7580.36	N.D.	N.D.	-
24h-0.03-1	287.0 / 35.1	5.53	39637.8	0.0243	0.024	0.0002		48H-Control-2	287.0 / 35.1	5.54	4663.52	N.D.
24h-0.03-2	287.0 / 35.1	5.53	39085.5	0.0239				48H-Control-3	287.0 / 35.1	5.55	5498.02	N.D.
24h-0.03-3	287.0 / 35.1	5.53	39107.9	0.0239				48H-0.03-1	287.0 / 35.1	5.55	29790.1	0.00902033	0.00647451	0.00242857
24h-0.13-1	287.0 / 35.1	5.53	134991	0.087	0.0885	0.0012		48H-0.03-2	287.0 / 35.1	5.55	25810.9	0.0071981
24h-0.13-2	287.0 / 35.1	5.53	137137	0.0884				48H-0.03-3	287.0 / 35.1	5.55	17091.5	0.0032051
24h-0.13-3	287.0 / 35.1	5.53	139628	0.0901				48H-0.13-1	287.0 / 35.1	5.54	103142	0.0426113	0.0393389	0.00249679
24h-0.26-1	287.0 / 35.1	5.53	253270	0.1649	0.1709	0.0049		48H-0.13-2	287.0 / 35.1	5.55	94931.1	0.0388512
24h-0.26-2	287.0 / 35.1	5.53	262779	0.1711				48H-0.13-3	287.0 / 35.1	5.55	89914.9	0.0365541
24h-0.26-3	287.0 / 35.1	5.54	271475	0.1768				48H-0.26-1	287.0 / 35.1	5.54	182712	0.0790499	0.0865507	0.00750073
24h-0.52-1	287.0 / 35.1	5.53	349275	0.5245	0.4431	0.0578		48H-0.26-2	287.0 / 35.1	5.54	215470	0.0940514
24h-0.52-2	287.0 / 35.1	5.53	264178	0.3957				48H-0.52-1	287.0 / 35.1	5.54	574872	0.258637	0.262539	0.00749909
24h-0.52-3	287.0 / 35.1	5.53	273077	0.4092				48H-0.52-2	287.0 / 35.1	5.55	606301	0.27303
24h-1.04-1	287.0 / 35.1	5.53	272337	0.8161	0.7936	0.0171		48H-0.52-3	287.0 / 35.1	5.55	569002	0.255949
24h-1.04-2	287.0 / 35.1	5.54	258643	0.7747				48H-1.04-1	287.0 / 35.1	5.55	1.28356e+06	0.583175	0.572493	0.0327581
24h-1.04-3	287.0 / 35.1	5.53	263730	0.7901				48H-1.04-2	287.0 / 35.1	5.55	1.33382e+06	0.606191
24h-1.73-1	287.0 / 35.1	5.53	310616	1.4588	1.4897	0.0237		48H-1.04-3	287.0 / 35.1	5.54	1.16332e+06	0.528113
24h-1.73-2	287.0 / 35.1	5.53	318022	1.4939				48H-1.73-1	287.0 / 35.1	5.54	900427	0.407723	0.382132	0.0420463
24h-1.73-3	287.0 / 35.1	5.53	322796	1.5165				48H-1.73-2	287.0 / 35.1	5.54	715099	0.322853
48h-Control-1	287.0 / 35.1	5.54	2969.04	N.D.	N.D.	-		48H-1.73-3	287.0 / 35.1	5.54	918106	0.415819
48h-Control-2	287.0 / 35.1	5.54	2731.55	N.D.				72H-Control-1	287.0 / 35.1	5.54	9484.59	N.D.	N.D.	-
48h-Control-3	287.0 / 35.1	5.54	2573.94	N.D.				72H-Control-2	287.0 / 35.1	5.54	7433.03	N.D.
48h-0.03-1	287.0 / 35.1	5.54	22653.4	0.0131	0.0134	0.0002		72H-Control-3	287.0 / 35.1	5.54	12570.1	N.D.
48h-0.03-2	287.0 / 35.1	5.53	23253.6	0.0135				72H-0.03-1	287.0 / 35.1	5.53	10392.2	0.000137171	0.00124356	0.00085996
48h-0.03-3	287.0 / 35.1	5.53	23337.6	0.0135				72H-0.03-2	287.0 / 35.1	5.54	13061.3	0.00135947
48h-0.13-1	287.0 / 35.1	5.54	87146.1	0.0555	0.0573	0.0014		72H-0.03-3	287.0 / 35.1	5.54	14971	0.00223404
48h-0.13-2	287.0 / 35.1	5.54	89800.6	0.0573				72H-0.13-1	287.0 / 35.1	5.53	40315.5	0.0138404	0.0126652	0.00247787
48h-0.13-3	287.0 / 35.1	5.54	92478.4	0.059				72H-0.13-2	287.0 / 35.1	5.54	42709.4	0.0149366
48h-0.26-1	287.0 / 35.1	5.54	187776	0.1218	0.1207	0.002		72H-0.13-3	287.0 / 35.1	5.54	30223	0.0092186
48h-0.26-2	287.0 / 35.1	5.54	188598	0.1223				72H-0.26-1	287.0 / 35.1	5.54	91295.6	0.0371864	0.0332453	0.0183867
48h-0.26-3	287.0 / 35.1	5.54	181877	0.1179				72H-0.26-2	287.0 / 35.1	5.53	126993	0.0535336
48h-0.52-1	287.0 / 35.1	5.54	196224	0.2928	0.2941	0.0028		72H-0.26-3	287.0 / 35.1	5.54	29780.4	0.00901591
48h-0.52-2	287.0 / 35.1	5.54	199627	0.298				72H-0.52-1	287.0 / 35.1	5.54	352311	0.156717	0.156029	0.00652968
48h-0.52-3	287.0 / 35.1	5.54	195241	0.2914				72H-0.52-2	287.0 / 35.1	5.54	367473	0.16366
48h-1.04-1	287.0 / 35.1	5.54	208236	0.6221	0.6218	0.0031		72H-0.52-3	287.0 / 35.1	5.53	332644	0.14771
48h-1.04-2	287.0 / 35.1	5.54	209393	0.6256				72H-1.04-1	287.0 / 35.1	5.54	1.07006e+06	0.485404	0.463036	0.0176677
48h-1.04-3	287.0 / 35.1	5.54	206853	0.6179				72H-1.04-2	287.0 / 35.1	5.53	1.01785e+06	0.461495
48h-1.73-1	287.0 / 35.1	5.54	97056.8	0.4468	0.4311	0.0113		72H-1.04-3	287.0 / 35.1	5.53	975735	0.44221
48h-1.73-2	287.0 / 35.1	5.54	92623.3	0.4258				72H-1.73-1	287.0 / 35.1	5.53	462725	0.20728	0.210031	0.00689585
48h-1.73-3	287.0 / 35.1	5.54	91531.4	0.4207				72H-1.73-2	287.0 / 35.1	5.53	454042	0.203304
72h-Control-1	287.0 / 35.1	5.53	2000.26	N.D.	N.D.	-		72H-1.73-3	287.0 / 35.1	5.52	489429	0.219509
72h-Control-2	287.0 / 35.1	5.53	2111.33	N.D.				96H-Control-1	287.0 / 35.1	5.52	9597.8	N.D.	N.D.	-
72h-Control-3	287.0 / 35.1	5.53	1761.87	N.D.				96H-Control-2	287.0 / 35.1	5.53	5742.08	N.D.
72h-0.03-1	287.0 / 35.1	5.53	8503.43	0.0038	0.0039	0.0001		96H-Control-3	287.0 / 35.1	5.53	6416.14	N.D.
72h-0.03-2	287.0 / 35.1	5.53	8567.34	0.0038				96H-0.03-1	287.0 / 35.1	5.53	10519	N.D.	N.D.	-
72h-0.03-3	287.0 / 35.1	5.53	8817.29	0.004				96H-0.03-2	287.0 / 35.1	5.53	10012.4	N.D.
72h-0.13-1	287.0 / 35.1	5.53	37801.4	0.0231	0.0229	0.0002		96H-0.03-3	287.0 / 35.1	5.54	8984.39	N.D.
72h-0.13-2	287.0 / 35.1	5.53	37134.6	0.0226				96H-0.13-1	287.0 / 35.1	5.52	22869.2	0.00585093	0.00572333	0.00021932
72h-0.13-3	287.0 / 35.1	5.53	37699.3	0.023				96H-0.13-2	287.0 / 35.1	5.53	22985.8	0.00590436
72h-0.26-1	287.0 / 35.1	5.54	94149.7	0.0601	0.0613	0.0018		96H-0.13-3	287.0 / 35.1	5.52	21916.6	0.0054147
72h-0.26-2	287.0 / 35.1	5.53	99705.4	0.0638				96H-0.26-1	287.0 / 35.1	5.53	60906	0.0232697	0.0240178	0.00215163
72h-0.26-3	287.0 / 35.1	5.54	93803.1	0.0599				96H-0.26-2	287.0 / 35.1	5.53	68934.5	0.0269462
72h-0.52-1	287.0 / 35.1	5.54	116742	0.1725	0.1832	0.0075		96H-0.26-3	287.0 / 35.1	5.52	57778.9	0.0218376
72h-0.52-2	287.0 / 35.1	5.54	127659	0.1891				96H-0.52-1	287.0 / 35.1	5.52	146717	0.0625664	0.0722311	0.00688585
72h-0.52-3	287.0 / 35.1	5.54	126877	0.1879				96H-0.52-2	287.0 / 35.1	5.52	180630	0.0780964
72h-1.04-1	287.0 / 35.1	5.54	142824	0.424	0.432	0.0097		96H-0.52-3	287.0 / 35.1	5.52	176119	0.0760306
72h-1.04-2	287.0 / 35.1	5.54	149962	0.4456				96H-1.04-1	287.0 / 35.1	5.52	252092	0.110822	0.14305	0.0240485
72h-1.04-3	287.0 / 35.1	5.54	143617	0.4264				96H-1.04-2	287.0 / 35.1	5.52	337109	0.149755
72h-1.73-1	287.0 / 35.1	5.54	32540.7	0.1411	0.1382	0.0058		96H-1.04-3	287.0 / 35.1	5.52	378200	0.168573
72h-1.73-2	287.0 / 35.1	5.54	33021.6	0.1434				96H-1.73-1	287.0 / 35.1	5.52	75883.7	0.0301286	0.0694665	0.027843
72h-1.73-3	287.0 / 35.1	5.54	30237.8	0.1302				96H-1.73-2	287.0 / 35.1	5.53	201462	0.0876364
96h-Control-1	287.0 / 35.1	5.53	1706.1	N.D.	N.D.	-		96H-1.73-3	287.0 / 35.1	5.52	208009	0.0906344
96h-Control-2	287.0 / 35.1	5.53	1574.86	N.D.
96h-Control-3	287.0 / 35.1	5.53	1458.11	N.D.
96h-0.03-1	287.0 / 35.1	5.54	4815.1	0.0014	0.0013	0.0001		time	type	0.03 μM	0.13 μM	0.26 μM	0.52 μM	1.04 μM	1.73 μM
96h-0.03-2	287.0 / 35.1	5.53	4780.79	0.0013				0	water	0.0418433	0.131584	0.245893	0.542247	1.04434	1.75816
96h-0.03-3	287.0 / 35.1	5.53	4590.39	0.0012				0	fish	-	-	-	-	-	-
96h-0.13-1	287.0 / 35.1	5.53	17949.8	0.01	0.0098	0.0003		12	water	0.0329672	0.109211	0.205855	0.464171	0.909404	1.65598
96h-0.13-2	287.0 / 35.1	5.53	16953	0.0093				12	fish	0.00680881	0.0266975	0.0874839	0.109104	0.270658	0.388873
96h-0.13-3	287.0 / 35.1	5.53	18086.9	0.0101				24	water	0.0240304	0.088501	0.170924	0.443073	0.7935	1.48951
96h-0.26-1	287.0 / 35.1	5.53	44354.7	0.0274	0.0271	0.0002		24	fish	0.0180809	0.0597567	0.103249	0.207155	0.580816	0.849236
96h-0.26-2	287.0 / 35.1	5.53	43747.2	0.027				48	water	0.0133751	0.0572896	0.120651	0.294067	0.621828	0.431102
96h-0.26-3	287.0 / 35.1	5.53	43578	0.0269				48	fish	0.00647451	0.0393389	0.0865507	0.262539	0.572493	0.382132
96h-0.52-1	287.0 / 35.1	5.54	129309	0.1916	0.1873	0.0033		72	water	0.00386378	0.0228939	0.0612895	0.183157	0.432034	0.138245
96h-0.52-2	287.0 / 35.1	5.53	126031	0.1866				72	fish	0.00124356	0.0126652	0.0332453	0.156029	0.463036	0.210031
96h-0.52-3	287.0 / 35.1	5.53	124088	0.1837				96	water	0.0012967	0.0098092	0.0270718	0.187269	0.243701	0.165408
96h-1.04-1	287.0 / 35.1	5.53	81224	0.2375	0.2437	0.0063		96	fish	-	0.00572333	0.0240178	0.0722311	0.14305	0.0694665
96h-1.04-2	287.0 / 35.1	5.53	86102	0.2523
96h-1.04-3	287.0 / 35.1	5.53	82447.4	0.2412
96h-1.73-1	287.0 / 35.1	5.53	38342.1	0.1686	0.1654	0.0024
96h-1.73-2	287.0 / 35.1	5.53	37564.5	0.1649
96h-1.73-3	287.0 / 35.1	5.53	37091	0.1627

## Sheet: Table S3
Table S3. Primer Sequences of receptor-associated genes for RT-PCR.
Gene name	Forward Primer (5’-3’)	Reverse Primer (5’-3’)	Accession number
β-actin	tggtattgtgatggactctg	attgccgatggtgatgac	AF057040
ryraa	atccatggacagccagaaac	catgttcggagaggttggtt	XM_001923259
ryrab	ctttcaagagcctgccaaag	agcacccatgatctcgattc	NM_001102571
ryrba	ggcactattggcaagcagat	attgccttgtggaaatctcg	XM_002667555
ryrbb	gttttcacgaaccggctaaa	tccttccaagatgaggatgg	XM_001921102
ryrg	aaggacagtgggatcgtttg	aaagtccagcgcactcttgt	XM_001922078
thr1	caatgtaccatttcgcgttg	gctcctgctctgtgttttcc	NM_131396
thr2	tgggagatgatacgggttgt	ataggtgccgatccaatgtc	NM_131340
ahr1	ggagagcacttgaggaaacg	ggatccagatcgtcctttga	NM_001024816
ahr2	atctccatgggcaaaacaag	tccctcttgtgtcgataccc	NM_131264
gr	agaccttggtccccttcact	cgcctttaatcatgggagaa	EF567112
mr	tttgagggaccagacaaacc	cacactttggctgtcgaaga	EF567113

## Sheet: Table S4
Table S4. Fold-change of gene expressions in NR pathways, *p<0.05, **p<0.01 indicates significant difference between exposure groups and the control.
12 hpf				24 hpf				48 hpf				72 hpf				96 hpf
Gene	Concentration (μM)	Log2 FC	p. value	Gene	Concentration (μM)	Log2 FC	p. value	Gene	Concentration (μM)	Log2 FC	p. value	Gene	Concentration (μM)	Log2 FC	p. value	Gene	Concentration (μM)	Log2 FC	p. value	Number of regulation	Ratio of regulation	EC50(μg/L)	EC50(μm)
ryraa	0.03	-1.41345	0.179	ryraa	0.03	-0.14894	4.34316e-05	ryraa	0.03	0.604504	0.211	ryraa	0.03	0.125651	4.34e-05	ryraa	0.03	-0.92057	1.51	0	0	395.42	1.36587
	0.13	0.0004329	0.9999		0.13	-0.98492	8.68676e-05		0.13	0.700873	0.348		0.13	-0.42993	0.000174		0.13	-0.31707	0.217	0	0	338.31
	0.26	-0.95608	0.3811		0.26	0.450762	0.100782		0.26	-0.32456	0.00476		0.26	-1.42663	1.6500 *		0.26	-2.64386	3.5200 **	2	0.4	686.34
	0.52	-0.79543	0.5046		0.52	-0.51635	0.0730919		0.52	-0.4681	0.0215		0.52	-0.40354	0.00013		0.52	-1.0145	1.6900 *	1	0.2	776.17
	1.04	-0.65474	0.639		1.04	0.755041	0.0101943		1.04	0.6567	0.28		1.04	0.584	0.003007		1.04	-1.07309	1.8000 *	1	0.2	713.6
	1.73	-0.99008	0.3592		1.73	-0.09394	0.415895		1.73	0.689285	0.329		1.73	2.77737	3.3979 **		1.73	-2.78588	3.5200 **	2	0.4	909.01
ryrab	0.03	0.151859	0.00013	ryrab	0.03	-0.53053	0.0566044	ryrab	0.03	0.455229	0.0429	ryrab	0.03	0.269033	0.000826	ryrab	0.03	-0.53699	0.388	0	0	338.31	1.1686
	0.13	-1.34263	0.166		0.13	-0.287536	0.0054629		0.13	0.524064	0.0803		0.13	-0.38703	0.001566		0.13	-0.04694	0.00013	0	0	686.34
	0.26	0.08134	4.34e-05		0.26	-1.19429	0.374276		0.26	-0.43499	0.00917		0.26	-0.22263	0.000174		0.26	-1.39436	1.6100 *	1	0.2	776.17
	0.52	0.348232	0.00723		0.52	0.254594	0.00757904		0.52	-0.2282	0.000739		0.52	-0.33461	0.000869		0.52	-0.69927	0.638	0	0	713.6
	1.04	-0.10315	8.69e-05		1.04	-0.37894	0.017367		1.04	0.015783	4.34e-05		1.04	0.556797	0.03541		1.04	-0.7847	0.771	0	0	909.01
	1.73	0.129613	0.00013		1.73	0.953824	1.1349		1.73	0.701327	0.249		1.73	2.10702	3.3979 **		1.73	-1.10209	1.24	1	0.2	877.1
ryrba	0.03	0.0229	4.34e-05	ryrba	0.03	0.194087	0.000173753	ryrba	0.03	0.345964	0.095	ryrba	0.03	0.063503	4.34316e-05	ryrba	0.03	0.855192	0.209	0	0	686.34	2.37078
	0.13	0.137504	0.00013		0.13	-0.0759761	4.34316e-05		0.13	-0.0068	4.34e-05		0.13	-0.43772	0.000130308		0.13	1.30334	0.885	0	0	776.17
	0.26	-0.03608	4.34e-05		0.26	-0.26413	0.000173753		0.26	-0.35052	0.0408		0.26	-0.74492	0.000869459		0.26	-0.37838	0.001	0	0	713.6
	0.52	0.414677	0.0179		0.52	0.336855	0.00235155		0.52	-0.29389	0.0212		0.52	-0.29814	0.000130308		0.52	0.201634	0.000174	0	0	909.01
	1.04	-0.17625	0.00013		1.04	0.088142	4.34316e-05		1.04	0.858379	1.43		1.04	0.936591	0.0388163		1.04	-0.01742	4.34e-05	0	0	877.1
	1.73	-0.04841	4.34e-05		1.73	1.38405	1.13253		1.73	-0.18771	0.00292		1.73	2.25565	4.0000 **		1.73	-0.72332	0.0143	1	0.2
ryrbb	0.03	0.041243	4.34e-05	ryrbb	0.03	0.130931	0.000130308	ryrbb	0.03	0.733788	0.509	ryrbb	0.03	-0.120294	4.34316e-05	ryrbb	0.03	3.05554	4.0000 **	0	0	776.17	2.68107
	0.13	-0.185573	0.00013		0.13	-0.278059	0.00169706		0.13	0.102994	0.00013		0.13	-0.8443	8.68676e-05		0.13	1.99603	1.5400 *	1	0.2	713.6
	0.26	-0.04142	4.34e-05		0.26	-0.57562	0.0290955		0.26	-0.04246	4.34e-05		0.26	-0.753166	8.68676e-05		0.26	0.518031	0.0024	0	0	909.01
	0.52	0.498761	0.0329		0.52	-0.03313	4.34316e-05		0.52	-0.01698	4.34e-05		0.52	-0.093879	4.34316e-05		0.52	0.325386	0.000174	0	0	877.1
	1.04	-0.07203	4.34e-05		1.04	0.646163	0.198734		1.04	1.53754	3.2200 **		1.04	1.38847	0.00833099		1.04	1.50426	2.5000 **	1	0.2
	1.73	-0.07248	4.34e-05		1.73	0.344828	0.0121104		1.73	-0.63263	0.0839		1.73	2.19881	1.4708 *		1.73	0.070389	4.34e-05	1	0.2	491.86
ryrg	0.03	-0.11138	0.000174	ryrg	0.03	-1.04305	0.805763	ryrg	0.03	0.362891	0.00288	ryrg	0.03	0.302173	0.00581487	ryrg	0.03	-0.97994	1.11	0	0	713.6	2.46494
	0.13	-0.077041	0.00013		0.13	-1.24127	1.01278		0.13	0.27262	0.000782		0.13	-0.2527	0.000912977		0.13	-0.62593	0.55	0	0	909.01
	0.26	-0.24811	0.00634		0.26	-1.8247	1.20864		0.26	-0.42411	0.00183		0.26	0.266637	0.00283213		0.26	-1.4489	1.7200 *	1	0.2	877.1
	0.52	0.24123	0.0122		0.52	-0.23786	0.0180003		0.52	-0.04498	4.34e-05		0.52	-0.310611	0.00230788		0.52	-0.72905	0.716	0	0
	1.04	-0.05185	8.69e-05		1.04	-0.43187	0.136915		1.04	0.365133	0.00292		1.04	-0.095882	8.68676e-05		1.04	-0.97143	1.09	0	0	491.86
	1.73	0.222805	0.0082		1.73	-0.65904	0.370794		1.73	0.573375	0.0347		1.73	0.539035	0.0953926		1.73	-1.42005	1.6900 *	1	0.2	720.93
ahr1	0.03			ahr1	0.03	-0.87183	0.318036	ahr1	0.03	-0.31833	0.0118	ahr1	0.03	-0.0725051	8.68676e-05	ahr1	0.03	-1.0389	0.367	0	0	909.01	3.13993
	0.13				0.13	-0.893085	0.332921		0.13	-1.05289	0.361		0.13	0.08586	0.000130308		0.13	-0.0145	4.34e-05	0	0	877.1
	0.26				0.26	-1.73361	0.864231		0.26	-0.38214	0.0242		0.26	-2.42387	1.8821 *		0.26	-0.60012	0.11	1	0.2
	0.52				0.52	-0.22694	0.00388252		0.52	-0.42993	0.037		0.52	-0.529265	0.0586874		0.52	0.810649	0.874	0	0	491.86
	1.04				1.04	0.028541	4.34316e-05		1.04	-2.52284	1.02		1.04	-0.762493	0.159204		1.04	-0.43635	0.0416	0	0	720.93
	1.73				1.73	0.36928	0.0815503		1.73	-0.44811	0.0427		1.73	-1.80044	1.6690 *		1.73	-1.63935	2.0000 **	2	0.4	1743.34
ahr2	0.03	0.418353	0.00599	ahr2	0.03	-0.13337	0.000173753	ahr2	0.03	0.124761	0.002	ahr2	0.03	0.252173	0.000130308	ahr2	0.03	0.641546	0.148	0	0	877.1	3.02971
	0.13	0.344125	0.00205		0.13	-0.461959	0.028585		0.13	-0.15912	0.00366		0.13	-0.3902	0.000173753		0.13	1.01507	1.5000 *	1	0.2
	0.26	0.310773	0.00109		0.26	-0.83136	0.15814		0.26	-0.23913	0.0229		0.26	-0.510457	0.000912977		0.26	-0.69736	0.0379	0	0
	0.52	1.01693	0.363		0.52	0.146655	0.000173753		0.52	-0.08776	0.000174		0.52	-0.0554414	4.34316e-05		0.52	-0.2282	0.000652	0	0
	1.04	0.349798	0.00218		1.04	0.480265	0.11334		1.04	0.409688	0.319		1.04	0.822118	0.0697134		1.04	-0.3419	0.00235	0	0
	1.73	0.346397	0.00126		1.73	0.155749	0.000651931		1.73	-0.36043	0.0963		1.73	2.90843	4.0000 **		1.73	-0.36531	0.00305	1	0.2
thr1	0.03	0.03984	4.34e-05	thr1	0.03	-0.55703	0.0261797	thr1	0.03	-0.18557	0.000869	thr1	0.03	-0.0291552	4.34316e-05	thr1	0.03	-0.7644	0.665	0	0		0
	0.13	-0.069906	8.69e-05		0.13	-0.351074	0.00410168		0.13	0.100305	0.00013		0.13	-0.0101	4.34316e-05		0.13	-0.402207	0.172	0	0	1743.34
	0.26	-0.37838	0.0242		0.26	-0.62371	0.0240171		0.26	-0.33697	0.0117		0.26	-0.616623	0.0783655		0.26	-0.682	0.546	0	0	395.42
	0.52	-0.14672	0.000174		0.52	0.425459	0.034422		0.52	-0.24246	0.0027		0.52	-0.252824	0.00256993		0.52	-0.23107	0.0284	0	0	338.31
	1.04	-0.24469	0.00375		1.04	0.57918	0.130416		1.04	0.360645	0.0443		1.04	-0.197664	0.000912977		1.04	-0.57132	0.389	0	0	686.34
	1.73	0.144046	0.000739		1.73	0.627607	0.176917		1.73	0.09356	0.00013		1.73	-0.732451	0.124707		1.73	-0.97909	0.966	0	0	776.17
thr2	0.03			thr2	0.03			thr2	0.03	-0.36457	0.0615	thr2	0.03	1.216	0.282143	thr2	0.03	-0.19595	0.0107	0	0	419.86	1.45029
	0.13				0.13				0.13	-0.3946	0.0816		0.13	0.9153	-0.1277		0.13	0.0538064	0.00013	0	0
	0.26				0.26				0.26	-0.63644	0.332		0.26	0.9807	-0.0281162		0.26	-1.00868	0.88	0	0
	0.52				0.52				0.52	-0.12816	0.000478		0.52	0.9147	-0.128629		0.52	-0.79161	0.607	0	0
	1.04				1.04				1.04	-1.74904	1.6300 *		1.04	1.576	0.656268		1.04	-0.73049	0.528	1	0.2
	1.73				1.73				1.73	-0.33406	0.0442		1.73	3.816	3.6678 **		1.73	-0.74009	0.541	1	0.2
mr	0.03	-0.50984	0.131	mr	0.03	-0.90698	0.526659	mr	0.03	-0.51313	0.218	mr	0.03	0.211635	0.00130484	mr	0.03	-0.49614	0.112	0	0	720.93	2.49026
	0.13	-0.790859	0.356		0.13	-0.732884	0.360912		0.13	-0.31599	0.0532		0.13	0.10969	0.000130308		0.13	0.283329	0.0382	0	0
	0.26	-1.31115	0.786		0.26	-0.85334	0.363312		0.26	-0.78662	0.524		0.26	-0.831358	0.153601		0.26	-0.79511	0.34	0	0
	0.52	-1.09142	0.612		0.52	-0.31169	0.0355518		0.52	-0.34245	0.0697		0.52	-0.344282	0.00890689		0.52	-0.16926	0.00183	0	0
	1.04	-0.99798	0.534		1.04	0.244887	0.0180908		1.04	-0.52907	0.234		1.04	-0.0578421	4.34316e-05		1.04	-0.47333	0.098	0	0
	1.73	-0.74009	0.313		1.73	0.412511	0.22062		1.73	-0.24588	0.021		1.73	-1.37707	1.5		1.73	-1.02709	0.534	1	0.2
gr	0.03	-0.19545	0.000174	gr	0.03	-0.08927	8.68676e-05	gr	0.03	-0.16004	0.000739	gr	0.03	0.389567	0.000130308	gr	0.03	1.18396	1.6200 *	1	0.2	1743.34	6.0219
	0.13	0.22033	0.000782		0.13	-0.101598	0.000130308		0.13	-0.36904	0.020998		0.13	0.32998	0.000130308		0.13	1.64975	1.7000 *	1	0.2
	0.26	-0.44949	0.00687		0.26	-1.05589	0.191924		0.26	-0.68803	0.147764		0.26	1.04754	0.0216369		0.26	0.085425	8.69e-05	0	0
	0.52	0.507921	0.0501		0.52	0.485427	0.0822845		0.52	-0.19876	0.00161		0.52	0.823749	0.0045842		0.52	0.367371	0.0127	0	0
	1.04	0.484396	0.0404		1.04	0.748461	0.401209		1.04	-0.23957	0.003182		1.04	1.0115	0.017367		1.04	0.041243	4.34e-05	0	0
	1.73	0.31034	0.00388		1.73	0.283329	0.00607904		1.73	-0.10361	0.00013		1.73	3.51602	4.0000 **		1.73	-0.02915	4.34e-05	1	0.2
